# Supplementary material for: Clinical outcomes and treatment patterns among Medicare patients with nonvalvular atrial fibrillation (NVAF) and chronic kidney disease
Source: PubMed Central journal article supplement (PMC6855694; doi:10.1371/journal.pone.0225052), 2019-11-14

*Supplemental Figure 1. Sample size flow diagram*

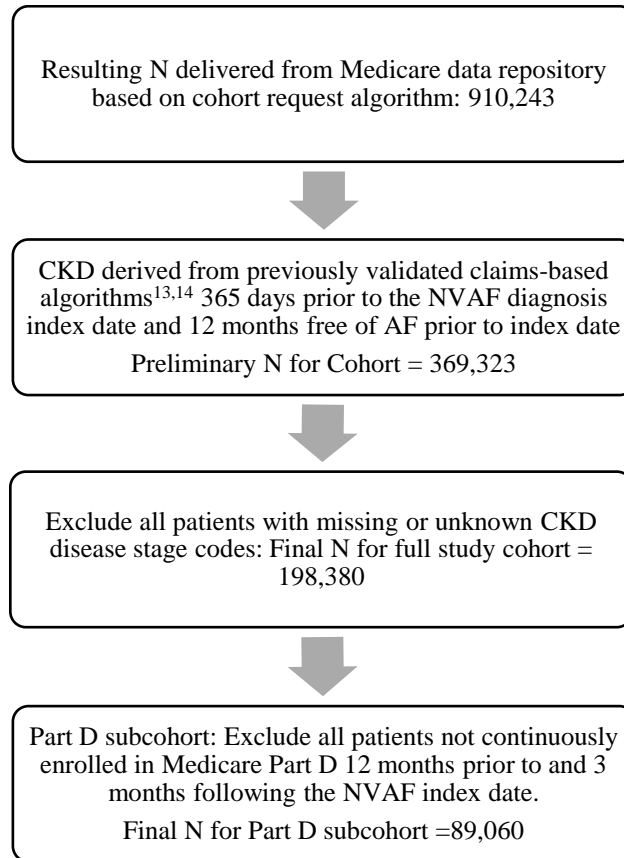

Supplement: pone.0225052.s001.pdf [file pone.0225052.s001.pdf]
